### Na<sup>+</sup>/H<sup>+</sup>-exchanger 3 regulator

|      | <b>Score</b>  | <b>Expect</b>                                                 | <b>Method</b>                | <b>Identities</b> | <b>Positives</b> | <b>Gaps</b> |
|------|---------------|---------------------------------------------------------------|------------------------------|-------------------|------------------|-------------|
|      | 121 bits(304) | 5e-31                                                         | Compositional matrix adjust. | 57/72(79%)        | 61/72(84%)       | 0/72(0%)    |
| A.F. | 28            | PRLCSLSKGTGGYGFNLHGEKKGKHFQFIRAVDPGSPADLAGVKPGDRVIEVSGTNIERET |                              |                   | 87               |             |
|      |               | PRLC L +G YGFFNLHGEKG HGQFIRAVD SPA+ AG+KPGDRVIEV+ TNIERE     |                              |                   |                  |             |
| S.K. | 10            | PRLCHLVRGDKGYGFNLHGEKGGHGFQFIRAVDKDSPAEAGLKPGRVIEVNNNTNIERN   |                              |                   | 69               |             |
| A.F. | 88            | HSQVVARIRADG                                                  |                              |                   | 99               |             |
|      |               | HSQVVARIRA G                                                  |                              |                   |                  |             |
| S.K. | 70            | HSQVVARIRAGG                                                  |                              |                   | 81               |             |

### Aspartate aminotransferase

|      | <b>Score</b>  | <b>Expect</b>                                                  | <b>Method</b>                | <b>Identities</b> | <b>Positives</b> | <b>Gaps</b> |
|------|---------------|----------------------------------------------------------------|------------------------------|-------------------|------------------|-------------|
|      | 203 bits(517) | 4e-61                                                          | Compositional matrix adjust. | 92/117(79%)       | 105/117(89%)     | 0/117(0%)   |
| A.F. | 1             | QSFAKNMGLYGERVGFSLICQDADEAKRCESQLKIIIRPMYSNPPVNGARIASTIMNTP    |                              |                   | 60               |             |
|      |               | QSFAKNMGLYGERVG F+++C A+EAKR ESQ+KI+IRPMYSNPP+NGARIASTI+NTP    |                              |                   |                  |             |
| S.P. | 276           | QSFAKNMGLYGERVGGFTVLCSSAAEEAKRVESQIKILIRPMYSNPPVNGARIASTIILNTP |                              |                   | 335              |             |
| A.F. | 61            | DLNTVWLDELKVMMSGRIITMREQLVANLQKEGSTRNQWQHITDQIGMFCFTGIGPDQV    |                              |                   | 117              |             |
|      |               | +L +WL EL+ MSGRII+MREQLVANLQKEGST NWQHITDQIGMFCFTG+ QV         |                              |                   |                  |             |
| S.P. | 336           | ELYELWLGLRQMSGRIISMREQLVANLQKEGSTHNWQHITDQIGMFCFTGLNXXQV       |                              |                   | 392              |             |

### Glutamate dehydrogenase 1

|      | <b>Score</b>  | <b>Expect</b>                                                 | <b>Method</b>                | <b>Identities</b> | <b>Positives</b> | <b>Gaps</b> |
|------|---------------|---------------------------------------------------------------|------------------------------|-------------------|------------------|-------------|
|      | 191 bits(485) | 1e-59                                                         | Compositional matrix adjust. | 91/102(89%)       | 96/102(94%)      | 0/102(0%)   |
| A.F. | 1             | YFEWLKLNHNHVSYGRITFKYERDSNTFLESVQESLERKFGRHGGRIPIVPESEKQARIS  |                              |                   | 60               |             |
|      |               | YFEWLKLNHNHVSYGRITFKYERDSN LL SVQESLERKFG+HGG IPIV+ +FQ RIS   |                              |                   |                  |             |
| M.M  | 47            | YFEWLKLNHNHVSYGRITFKYERDSNYHLLMSVQESLERKFGKHGGTIPIVPTAEFQDRIS |                              |                   | 106              |             |
| A.F. | 61            | GATEKDIVNSGLAYTMERSARQIMRTAMKYNLGLDLRТАAYV                    |                              |                   | 102              |             |
|      |               | GA+EKDIV+SGLAYTMERSARQIMRTAMKYNLGLDLRТАAYV                    |                              |                   |                  |             |
| M.M. | 107           | GASEKDIVHNSGLAYTMERSARQIMRTAMKYNLGLDLRТАAYV                   |                              |                   | 148              |             |

### Succinate dehydrogenase

|      | <b>Score</b>   | <b>Expect</b>                                                 | <b>Method</b>                | <b>Identities</b> | <b>Positives</b> | <b>Gaps</b> |
|------|----------------|---------------------------------------------------------------|------------------------------|-------------------|------------------|-------------|
|      | 86.3 bits(212) | 7e-19                                                         | Compositional matrix adjust. | 48/113(42%)       | 71/113(62%)      | 10/113(8%)  |
| A.F. | 3              | MATNSLLRANRVLSLAPSLMGKTCL--PCCSRTPLVVGSTKLHTSPQRHSGDGHGMMGS   |                              |                   | 60               |             |
|      |                | MA N +LR+ R L +P LM L P + P ++ + LHT+ H+ G++ S                |                              |                   |                  |             |
| S.P. | 1              | MAMN-ILRS-RALLTS PRLMTSAFLKSPYQANYPAMLNT--LHTTHNNHTA----GLLPS |                              |                   | 52               |             |
| A.F. | 61             | THWNIERAVIIGMGLTPAALITHHPALDVALSAAFVVGHWGLENIFTDYVY           |                              |                   | 113              |             |
|      |                | HWN ER + IG++G+ PAA + +PALD AL+A+ V+HGHWG+E +F DYV+           |                              |                   |                  |             |
| S.P. | 53             | KHWNAERVLSIGLIGIIPAAFLIQNPALDYALAASLVLHGHWGMEQVFLDYVH         |                              |                   | 105              |             |

### D-lactate dehydrogenase

|      | <b>Score</b>  | <b>Expect</b>                                                 | <b>Method</b>            | <b>Identities</b> | <b>Positives</b> | <b>Gaps</b> |
|------|---------------|---------------------------------------------------------------|--------------------------|-------------------|------------------|-------------|
|      | 113 bits(283) | 4e-28                                                         | Composition-based stats. | 55/74(74%)        | 59/74(79%)       | 0/74(0%)    |
| A.F. | 2             | VQPGVTRNALNDYL RDQGLCFPIDPGADASLCGMAATSASGTNAVRYGTTWENVMLLEV  |                          |                   |                  | 61          |
|      |               | VQPGVTR LN YLRDQGL FPIDPGADAS+CGM ATASGTNAVRYGT ENVMNL+VV     |                          |                   |                  |             |
| S.K. | 148           | VQPGVTRKMLNKYL RDQGLWFPIIDPGADASICGMCATSASGTNAVRYGTMRENVMLQVV |                          |                   |                  | 207         |
| A.F. | 62            | LSRWNINRYCWQ GK                                               | 75                       |                   |                  |             |
|      |               | L+ I +GK                                                      |                          |                   |                  |             |
| S.K. | 208           | LADGTIINTAGEGK                                                | 221                      |                   |                  |             |

### Na<sup>+</sup>/HCO<sub>3</sub><sup>-</sup> cotransporter

|      | <b>Score</b>   | <b>Expect</b>                                                 | <b>Method</b>            | <b>Identities</b> | <b>Positives</b> | <b>Gaps</b> |
|------|----------------|---------------------------------------------------------------|--------------------------|-------------------|------------------|-------------|
|      | 72.8 bits(177) | 7e-13                                                         | Composition-based stats. | 36/77(47%)        | 48/77(62%)       | 0/77(0%)    |
| A.F. | 1              | ESGSTRRKTQVVGCREQRVTGFVVFLLI GLAVLMTNYYWLFQCQYYMAYSSSVGISSXKG |                          |                   |                  | 60          |
|      |                | E + + ++VGCREQRVTG +VF++IGLA LMT                              |                          |                   | +GI+S KG         |             |
| S.P. | 915            | ECKAPGERPKIVGCREQRVTGVMVFVMIGLATLMTKILSYVPMPLYGVFLFMGIASLKG   |                          |                   |                  | 974         |
| A.F. | 61             | VQFVNRLNLLFMPXKHH                                             | 77                       |                   |                  |             |
|      |                | VQFV+RL+L FMP K+                                              |                          |                   |                  |             |
| S.P. | 975            | VQFVDRLSLFFMPLKYQ                                             | 991                      |                   |                  |             |

### V-type proton ATPase subunit d 1-like isoform 1

|      | <b>Score</b>  | <b>Expect</b>                                            | <b>Method</b>            | <b>Identities</b> | <b>Positives</b> | <b>Gaps</b> |
|------|---------------|----------------------------------------------------------|--------------------------|-------------------|------------------|-------------|
|      | 115 bits(288) | 1e-29                                                    | Composition-based stats. | 48/55(87%)        | 54/55(98%)       | 0/55(0%)    |
| A.F. | 1             | HEVKLVNNGFMQQFHYGVFYSYVKLKEQECRNIVWIAECVAQRQRGKIDNYIPIL  |                          |                   |                  | 55          |
|      |               | HEV+LN+N F+QQFH+GVFY+YVKLKEQECRNIVWIAECVAQRQRGKIDNYIPI+  |                          |                   |                  |             |
| S.P. | 294           | HEVRLNINAF LQQFHFVGFYAYVKLKEQECRNIVWIAECVAQRQRGKIDNYIPIM |                          |                   |                  | 348         |

### sodium/potassium ATPase alpha subunit

|      | <b>Score</b>   | <b>Expect</b>                                    | <b>Method</b>            | <b>Identities</b> | <b>Positives</b> | <b>Gaps</b> |
|------|----------------|--------------------------------------------------|--------------------------|-------------------|------------------|-------------|
|      | 96.3 bits(238) | 1e-21                                            | Composition-based stats. | 41/47(87%)        | 44/47(93%)       | 0/47(0%)    |
| A.F. | 1              | YAQRKVLEYTCHTAFFVSIVVVQWADVIIICKTRKNSLIHQGMHNWVL |                          |                   |                  | 47          |
|      |                | + QRK LEYTCHTAFF SIVVVQWADVIIICKTR+NSLIHQGM+NWVL |                          |                   |                  |             |
| S.P. | 918            | FYQRKQLEYTCHTAFFASIVVVQWADVIIICKTRRNSLIHQGMNNWVL |                          |                   |                  | 964         |

glucose-6-phosphate 1-dehydrogenase -like

| Score          | Expect | Method                                                    | Identities | Positives  | Gaps     |
|----------------|--------|-----------------------------------------------------------|------------|------------|----------|
| 98.2 bits(243) | 7e-23  | Composition-based stats.                                  | 45/66(68%) | 51/66(77%) | 0/66(0%) |
| A.F.           | 1      | KPATTNAEDIRNEKVKVLKTI EALELKDVVLGQYVGD PDGEGDAKEGYLEDPTVP | 55         |            |          |
|                |        | KPA+T AEDIRNEKVKVLK I L + D+VLGQY GDPDGE GDAKEGYL+D TVP   |            |            | +G       |
| S.P.           | 232    | KPASTGAEDIRNEKVKVLK AISPLTVDDMVLGQYEGDPDGE GDAKEGYLDDSTVP | 286        |            |          |
| A.F.           | 66     | RGICHPNLCYG 66                                            |            |            |          |
|                |        | +G+G P +                                                  |            |            |          |
| S.P.           | 298    | KGSTTPTFAFA 297                                           |            |            |          |

alanine aminotransferase 2-like

| Score          | Expect | Method                                     | Identities | Positives  | Gaps     |
|----------------|--------|--------------------------------------------|------------|------------|----------|
| 60.8 bits(146) | 2e-09  | Composition-based stats.                   | 23/37(62%) | 31/37(83%) | 0/37(0%) |
| A.F.           | 1      | DEESGWSLQIPELKRAIDEARKHCKPVAMVVINPGQP 37   |            |            |          |
|                |        | DE++ WSL + EL+R+I+EARKHC P A+V+INPG P      |            |            |          |
| S.P.           | 239    | DEDNAWSLDM AELQRSINEARKHCTPRAIVIINPGNP 275 |            |            |          |

**Figure S1** Deduced amino acid alignments of gene sequences used for gene expression analyses. Sequences of *Amphiura filiformis* (A.F.) are aligned with related sequences from *Strongylocentrotus purpuratus* (S.P.), *Saccoglossus kowalevskii* (S.K.) *Macaca mulatta* (M.M.).

**Table S1** Biometric data (long-term experiment n = 4). Growth of body parts (disc, arms) during exposure to three pH levels (pH 8.1, pH 7.3 and pH 7.0), wet mass (WM), dry mass (DM), ash-free dry mass (AFDM) and ash dry mass (ADM) along the experimental time of 4 weeks. Values are given as means  $\pm$  SE. No statistical differences were measured (Two way ANOVA see table S2).

|                     | day 7              |                    |                    | day 14             |                    |                    |
|---------------------|--------------------|--------------------|--------------------|--------------------|--------------------|--------------------|
|                     | pH 8.1             | pH 7.3             | pH 7.0             | pH 8.1             | pH 7.3             | pH 7.0             |
| <u>WM</u>           |                    |                    |                    |                    |                    |                    |
| total               | 287.23 $\pm$ 12.57 | 301.13 $\pm$ 29.92 | 282.50 $\pm$ 9.13  | 274.82 $\pm$ 12.93 | 260.34 $\pm$ 7.31  | 268.77 $\pm$ 20.21 |
| disc                | 69.48 $\pm$ 2.46   | 69.86 $\pm$ 5.94   | 68.13 $\pm$ 4.49   | 64.48 $\pm$ 3.02   | 66.25 $\pm$ 2.79   | 65.91 $\pm$ 5.18   |
| arms                | 217.75 $\pm$ 11.99 | 231.27 $\pm$ 24.18 | 214.37 $\pm$ 8.04  | 210.34 $\pm$ 12.01 | 194.09 $\pm$ 4.67  | 202.86 $\pm$ 16.47 |
| <u>DM</u>           |                    |                    |                    |                    |                    |                    |
| total               | 104.97 $\pm$ 3.83  | 108.82 $\pm$ 10.39 | 106.89 $\pm$ 3.87  | 108.31 $\pm$ 4.35  | 100.23 $\pm$ 1.79  | 104.87 $\pm$ 6.89  |
| disc                | 24.44 $\pm$ 0.69   | 24.88 $\pm$ 1.96   | 24.40 $\pm$ 1.53   | 24.16 $\pm$ 1.06   | 23.54 $\pm$ 0.52   | 24.54 $\pm$ 1.80   |
| arms                | 80.53 $\pm$ 3.98   | 83.93 $\pm$ 8.49   | 82.49 $\pm$ 3.18   | 84.15 $\pm$ 4.12   | 76.68 $\pm$ 1.39   | 80.32 $\pm$ 5.29   |
| <u>AFDM</u>         |                    |                    |                    |                    |                    |                    |
| total               | 54.57 $\pm$ 2.01   | 51.70 $\pm$ 3.89   | 51.64 $\pm$ 6.23   | 60.32 $\pm$ 2.38   | 54.61 $\pm$ 0.17   | 56.91 $\pm$ 2.66   |
| disc                | 14.62 $\pm$ 0.40   | 14.06 $\pm$ 0.94   | 13.95 $\pm$ 1.56   | 15.25 $\pm$ 0.66   | 14.60 $\pm$ 0.25   | 15.72 $\pm$ 1.02   |
| arms                | 39.95 $\pm$ 2.06   | 37.64 $\pm$ 2.98   | 37.70 $\pm$ 4.84   | 45.07 $\pm$ 2.17   | 40.01 $\pm$ 0.40   | 41.18 $\pm$ 1.92   |
| <u>ADM</u>          |                    |                    |                    |                    |                    |                    |
| total               | 50.40 $\pm$ 1.93   | 57.12 $\pm$ 8.34   | 55.25 $\pm$ 3.33   | 48.00 $\pm$ 2.03   | 45.62 $\pm$ 1.77   | 47.96 $\pm$ 4.40   |
| disc                | 9.82 $\pm$ 0.42    | 10.82 $\pm$ 1.35   | 10.46 $\pm$ 0.86   | 8.92 $\pm$ 0.43    | 8.95 $\pm$ 0.37    | 8.82 $\pm$ 0.80    |
| arms                | 40.58 $\pm$ 2.12   | 46.29 $\pm$ 7.02   | 44.79 $\pm$ 2.77   | 39.08 $\pm$ 1.96   | 36.67 $\pm$ 1.44   | 39.14 $\pm$ 3.69   |
| <u>Ratio ADM/DM</u> |                    |                    |                    |                    |                    |                    |
| total               | 480.12 $\pm$ 4.54  | 515.31 $\pm$ 31.05 | 522.73 $\pm$ 46.92 | 443.02 $\pm$ 3.24  | 454.39 $\pm$ 9.29  | 454.02 $\pm$ 12.51 |
| disc                | 401.49 $\pm$ 9.09  | 429.81 $\pm$ 24.65 | 433.22 $\pm$ 41.52 | 368.85 $\pm$ 5.33  | 379.41 $\pm$ 8.99  | 357.23 $\pm$ 9.58  |
| arms                | 503.90 $\pm$ 8.55  | 540.68 $\pm$ 32.45 | 548.88 $\pm$ 48.67 | 464.30 $\pm$ 2.49  | 477.47 $\pm$ 10.27 | 483.67 $\pm$ 15.24 |
| <hr/>               |                    |                    |                    |                    |                    |                    |
|                     | day 21             |                    |                    | day 28             |                    |                    |
|                     | pH 8.1             | pH 7.3             | pH 7.0             | pH 8.1             | pH 7.3             | pH 7.0             |
| <u>WM</u>           |                    |                    |                    |                    |                    |                    |
| total               | 258.66 $\pm$ 25.57 | 253.49 $\pm$ 15.77 | 236.13 $\pm$ 25.80 | 247.15 $\pm$ 6.73  | 216.24 $\pm$ 31.94 | 226.44 $\pm$ 16.90 |
| disc                | 64.88 $\pm$ 4.62   | 71.57 $\pm$ 3.33   | 62.26 $\pm$ 5.68   | 62.71 $\pm$ 2.61   | 58.78 $\pm$ 9.33   | 59.07 $\pm$ 3.10   |
| arms                | 193.78 $\pm$ 21.08 | 181.92 $\pm$ 13.00 | 173.87 $\pm$ 20.12 | 184.44 $\pm$ 4.18  | 157.46 $\pm$ 22.99 | 167.37 $\pm$ 13.96 |
| <u>DM</u>           |                    |                    |                    |                    |                    |                    |
| total               | 104.73 $\pm$ 11.69 | 102.07 $\pm$ 6.45  | 96.82 $\pm$ 11.09  | 100.27 $\pm$ 2.68  | 88.04 $\pm$ 13.18  | 91.16 $\pm$ 5.95   |
| disc                | 23.92 $\pm$ 1.80   | 25.83 $\pm$ 1.07   | 22.88 $\pm$ 1.72   | 23.13 $\pm$ 0.89   | 20.21 $\pm$ 2.55   | 21.65 $\pm$ 0.92   |
| arms                | 80.81 $\pm$ 9.94   | 76.25 $\pm$ 5.42   | 73.94 $\pm$ 9.39   | 77.14 $\pm$ 1.84   | 67.83 $\pm$ 10.65  | 69.51 $\pm$ 5.08   |
| <u>AFDM</u>         |                    |                    |                    |                    |                    |                    |
| total               | 55.07 $\pm$ 6.35   | 54.49 $\pm$ 3.51   | 51.72 $\pm$ 6.32   | 56.62 $\pm$ 1.70   | 49.45 $\pm$ 7.60   | 51.41 $\pm$ 3.60   |
| disc                | 14.00 $\pm$ 1.07   | 15.21 $\pm$ 0.76   | 13.64 $\pm$ 1.19   | 14.49 $\pm$ 0.58   | 12.57 $\pm$ 1.72   | 13.47 $\pm$ 0.80   |
| arms                | 41.07 $\pm$ 5.28   | 39.28 $\pm$ 2.86   | 38.09 $\pm$ 5.14   | 42.13 $\pm$ 1.18   | 36.88 $\pm$ 5.91   | 37.94 $\pm$ 2.84   |
| <u>ADM</u>          |                    |                    |                    |                    |                    |                    |
| total               | 49.66 $\pm$ 5.35   | 47.58 $\pm$ 2.99   | 45.10 $\pm$ 4.77   | 43.65 $\pm$ 1.00   | 38.59 $\pm$ 5.58   | 39.75 $\pm$ 2.35   |
| disc                | 9.92 $\pm$ 0.77    | 10.62 $\pm$ 0.45   | 9.25 $\pm$ 0.53    | 8.64 $\pm$ 0.34    | 7.65 $\pm$ 0.84    | 8.18 $\pm$ 0.12    |
| arms                | 39.75 $\pm$ 4.66   | 36.97 $\pm$ 2.56   | 35.85 $\pm$ 4.26   | 35.01 $\pm$ 0.67   | 30.95 $\pm$ 4.75   | 31.57 $\pm$ 2.24   |
| <u>Ratio ADM/DM</u> |                    |                    |                    |                    |                    |                    |
| total               | 475.13 $\pm$ 2.64  | 466.34 $\pm$ 4.10  | 468.09 $\pm$ 4.53  | 435.56 $\pm$ 2.34  | 439.90 $\pm$ 2.62  | 436.92 $\pm$ 3.00  |
| disc                | 414.23 $\pm$ 8.59  | 411.76 $\pm$ 11.15 | 406.81 $\pm$ 8.11  | 373.60 $\pm$ 4.60  | 381.47 $\pm$ 6.98  | 379.87 $\pm$ 10.66 |
| arms                | 493.62 $\pm$ 3.63  | 485.07 $\pm$ 1.69  | 487.41 $\pm$ 4.55  | 454.13 $\pm$ 2.46  | 457.79 $\pm$ 2.42  | 454.57 $\pm$ 1.23  |

**Table S2** Statistical information to the biometric data presented in table S1. Two way ANOVA was performed to test for differences between pH treatments and time factor (n = 4).

|                     | disc      |       | arms      |       | total     |        |
|---------------------|-----------|-------|-----------|-------|-----------|--------|
|                     | F (2;3;6) | p     | F (2;3;6) | p     | F (2;3;6) | p      |
| <u>WM</u>           |           |       |           |       |           |        |
| pH                  | 0.226     | 0.799 | 0.452     | 0.64  | 0.3       | 0.742  |
| time                | 1.228     | 0.314 | 4.045     | 0.014 | 495.552   | <0.001 |
| pH x time           | 0.213     | 0.97  | 0.235     | 0.962 | 0.195     | 0.976  |
| <u>DM</u>           |           |       |           |       |           |        |
| pH                  | 0.0879    | 0.916 | 0.392     | 0.679 | 0.326     | 0.724  |
| time                | 1.581     | 0.211 | 1.072     | 0.373 | 1.187     | 0.328  |
| pH x time           | 0.437     | 0.849 | 0.154     | 0.987 | 0.174     | 0.982  |
| <u>AFDM</u>         |           |       |           |       |           |        |
| pH                  | 0.172     | 0.842 | 0.845     | 0.438 | 0.689     | 0.509  |
| time                | 0.939     | 0.432 | 0.415     | 0.743 | 0.504     | 0.682  |
| pH x time           | 0.393     | 0.879 | 0.0461    | 1     | 0.0856    | 0.997  |
| <u>ADM</u>          |           |       |           |       |           |        |
| pH                  | 0.157     | 0.855 | 0.0475    | 0.954 | 0.035     | 0.966  |
| time                | 4.274     | 0.011 | 3.353     | 0.029 | 3.535     | 0.024  |
| pH x time           | 0.412     | 0.866 | 0.32      | 0.922 | 0.322     | 0.921  |
| <u>Ratio ADM/DM</u> |           |       |           |       |           |        |
| pH                  | 0.325     | 0.725 | 0.489     | 0.617 | 0.393     | 0.678  |
| time                | 5.144     | 0.005 | 6.192     | 0.002 | 0.023     | 0.002  |
| pH x time           | 0.292     | 0.937 | 0.319     | 0.923 | 0.319     | 0.923  |
